# Supplementary material
Source: publisher site journal article supplement (https://www.dovepress.com/article/558429)
Supplement: Supplementary file 1 [file 558429%20Supplementary%20Materials%20Updated.docx]

**Supplementary Data**

**Supplementary Table 1.** Diagnostic codes for cancer types included in the study **(a)** ICD-10 codes, **(b)** CPRD Aurum Medical Code IDs, and **(c)** CPRD GOLD Medical Codes

**(a)**

| **Cancer** | **ICD-10 code** |
| --- | --- |
| Acute lymphoblastic leukemia | C91.0 |
| Acute myeloid leukemia | C92.0, C92.3, C92.4, C92.5, C92.6, C92.8, C93.0, C94.0, C94.4, C94.5 |
| Bladder cancer | C67, C67.0, C67.1, C67.2, C67.3, C67.4, C67.5, C67.8, C67.9, D09.0 |
| Brain cancer | C71.7, C71.8, C71.9, C72.8 |
| Breast cancer | D05.0, C50, C50.0, C50.1, C50.2, C50.3, C50.4, C50.5, C50.6, C50.8, C50.9, D05, D05.1, D05.7, D05.9 |
| Colorectal cancer | C18, C18.0, C18.2, C18.3, C18.4, C18.5, C18.6, C18.7, C18.8, C18.9, C19, C20, C21, C21.0, C21.1, C21.2, C21.8, D01.0, D01.1, D01.2, D01.3 |
| Esophageal cancer | C15, C15.0, C15.1, C15.2, C15.3, C15.4, C15.5, C15.8, C15.9, D00.1 |
| Gastric cancer | C16.0, C16.4, C16, C16.1, C16.2, C16.3, C16.5, C16.6, C16.8, C16.9, D00.2 |
| Head and neck cancer | C44.3, C44.4, C00, C00.0, C00.1, C00.2, C00.3, C00.4, C00.5, C00.6, C00.8, C00.9, C01, C02, C02.0, C02.1, C02.2, C02.3, C02.8, C02.9, C04, C04.0, C04.1, C04.8, C04.9, C05, C05.0, C05.1, C05.2, C05.8, C05.9, C06, C06.1, C06.8, C06.9, C07, C08.0, C09.0, C09.1, C13.1, C14, C14.1, C14.8, C32.3, C41.1, C44.0, C47.0, C49.0, C75.2, C76.0, D00.0, D04.0 |
| Lung cancer | C33, C34, C34.0, C34.1, C34.2, C34.3, C34.8, C34.9, C49.3, C76.1, D02.1, D02.2 |
| Melanoma | C43, C43.0, C43.1, C43.2, C43.3, C43.4, C43.5, C43.6, C43.7, C43.8, C43.9, D03, D03.0, D03.1, D03.2, D03.3, D03.4, D03.5, D03.6, D03.7, D03.8, D03.9 |
| Multiple myeloma | C90.0, C90.1 |
| Neuroendocrine cancer | C73, C74, C74.0, C74.1, C74.9, C75, C75.0, C75.1, C75.2, C75.3, C75.4, C75.5, C75.8, C75.9 |
| Ovarian cancer | C56 |
| Pancreatic cancer | C25, C25.0, C25.1, C25.2, C25.3, C25.4, C25.7, C25.8, C25.9 |
| Prostate cancer | C61, D07.5 |
| Renal cancer | C64, C65 |
| Thyroid cancer | C73, C75.0, D09.3 |
| Uterine cancer | C54.1, C54.2, C54, C54.0, C54.3, C54.8, C54.9, C55 |

**(b)**

| **Cancer** | **CPRD Aurum Medical Code ID** |
| --- | --- |
| Acute lymphoblastic leukemia | 414160018, 2853531000006111, 2853551000006116, 3992641000006117, 5601291000006110, 6841261000006116 |
| Acute myeloid leukemia | 88121017, 133678011, 201612010, 201658011, 292075015, 344846014, 414220013, 476225016, 1216029010, 1216284012, 1216346016, 1228268017, 2532080014, 2534415018, 2872264019, 304331000006110, 304381000006111, 304401000006111, 304421000006118, 304431000006115, 307591000006111, 456641000006119, 458201000006115, 459741000006115, 880851000006117, 880881000006113, 2124991000000117, 2726671000006116, 2726721000006113, 2726791000006110, 2726821000006118, 2782221000006112, 2965511000006118, 2965521000006114, 2965541000006119, 2965551000006117, 2965581000006113, 2965591000006111, 2965601000006115, 2965611000006117, 2999011000006111, 2999021000006115, 3068701000006115,  3810361000006116, 3810391000006112, 3992711000006112, 3992761000006110, 3992791000006119, 3992801000006118,  4020841000006118, 4020861000006119, 4020881000006112, 4172971000006113, 4173521000006112, 4173531000006110,  4173541000006117, 4173551000006115, 4173571000006113, 4173581000006111, 4173591000006114, 4173601000006118,  4173611000006115, 4173621000006111, 4173631000006114, 4173641000006116, 4173651000006119, 4173671000006112,  4173681000006110, 4173691000006113, 4753311000006117, 4753321000006113, 5601901000006110, 6841311000006111,  6841321000006115, 7304861000006113, 7308311000006114, 11906781000006110, 12702801000006115 |
| Bladder cancer | 153107012, 289262014, 289267015, 289270016, 289271017, 289272012, 289275014, 289279015, 289280017, 289281018, 1786811017, 880461000006118, 4005911000006112, 4390021000006111, 4750131000006119, 4750141000006112, 4750161000006111, 4750171000006116, 4750181000006118, 4750191000006115, 4750201000006117, 4750221000006110, 4750231000006113,  4750271000006111, 4750281000006114, 4750341000006110,  4750351000006112, 6620961000006112, 6620971000006117,  6620981000006119, 6621001000006115 |
| Brain cancer | 175996013, 289357011, 289360016, 289364013, 289365014, 291957016,  403757015, 2550105015, 2552865010, 2692069010, 308851000006119, 309091000006112, 309231000006115, 309251000006110, 309261000006112,  309281000006119, 309301000006115, 309321000006113, 312871000006112,  312911000006110, 317161000006114, 396251000006115, 720631000006115,  727511000006114, 727521000006118, 2849391000006118, 2918291000006119, 3068321000006114, 3217421000006112, 3534951000006118, 3534961000006116, 3534971000006111, 3534981000006114, 3711491000006112, 3711501000006116, 3711511000006118, 4171631000006110, 5353101000006111, 5353111000006114 |
| Breast cancer | 155089014, 155417012, 174576019, 174577011, 289137018, 289140018, 289141019, 289142014, 289143016, 289144010, 289145011, 289146012, 289147015, 289148013, 289149017, 289150017, 289151018, 290867017, 290868010, 291530011, 291539012, 291540014, 291543011, 292137017, 292214019, 1210642019, 1228259019, 1231363012, 1232564019, 310451000006116, 310741000006110, 311221000006116, 314091000006113,  314671000006116, 314691000006115, 314711000006117, 316311000006112,  880261000006119, 881181000006112, 907341000006116, 2546721000006114,  2546741000006119, 2546761000006115, 2796431000006114, 2992261000006111, 2992271000006116, 2992281000006118, 2992291000006115, 2992321000006112, 2992331000006110,  3067781000006111, 3067791000006114, 3067801000006110, 3067811000006113, 3067821000006117, 3175581000006112,  3387071000006114, 3387081000006112, 3549251000006113, 3756761000006114, 3756781000006116, 3756791000006118,  3843581000006117, 3845591000006115, 3908461000006119, 3908471000006114, 3908481000006112, 3908531000006110,  3908541000006117, 3908551000006115, 3908561000006118,  3958781000006114, 3958791000006112, 4024671000006119,  4027021000006119, 4255461000006119, 4390821000006118,  4390831000006115, 4756261000006118, 5351491000006113,  5351501000006117, 5351511000006119, 5351521000006110,  5351531000006113, 6363631000006118, 6363641000006111,  11918121000006112, 12723471000006112 |
| Colorectal cancer | 153102018, 153133016, 153141016, 153187010, 153299011, 153300015, 153313014, 153388012, 155488014, 201638010, 288670017, 288671018,  288675010, 288748012, 288749016, 288751017, 290749015, 290750015,  290751016, 290752011, 291402014, 291434017, 291436015, 291437012,  379088010, 379089019, 380129018, 403682011, 403752014, 459527013,  1216464010, 1230440012, 1230709016, 1231004013, 1231622010, 1232066010, 304531000006116, 313231000006119, 317881000006113,  318101000006112, 517421000000115, 573611000006118, 720501000006110,  721421000006112, 721821000006114, 721991000006115, 722441000006110,  725191000006116, 725951000006112, 726331000006111, 727321000006111,  841331000006115, 907001000006115, 907331000006114, 933251000006113,  1728161000006116, 2578161000006117, 2589791000006112, 2958641000006118, 3264681000006117, 3336471000006114,  3434561000006119, 3479091000006118, 3479111000006110,  3685721000006112, 3685751000006115, 3685781000006111, 4006321000006114, 4008151000006119, 4027671000006114,  4388771000006110, 4388781000006113, 5346461000006110,  6053471000006110, 6053491000006111, 6242891000006114,  6242911000006111, 6242921000006115, 6242981000006116,  6243001000006117, 6243011000006119, 6244991000006113,  6245001000006118, 6245011000006115, 6245061000006117, 6245081000006110, 6245101000006119, 6245111000006116,  6245131000006110, 6245151000006115, 6245161000006118,  6245201000006112, 6245211000006110, 6245251000006111,  6245271000006118, 6245281000006115, 6247931000006115,  11904531000006110, 11906061000006115, 11909351000006110,  11909361000006112, 11923481000006115, 12204961000006112,  12725431000006113, 12762151000006112, 12762201000006115,  13031481000006119, 13031521000006119 |
| Esophageal cancer | 201640017, 288589012, 288594012, 288597017, 288602012, 288607018, 288608011, 288614016, 290732010, 403674011, 1215862010, 1216486011, 1216488012, 1217274016, 1217275015, 1217276019, 907391000006113, 4006591000006119, 4007411000006114, 4007571000006118, 4009131000006119, 4009151000006114, 4170491000006116, 4746581000006111, 4746621000006111, 4746661000006117,  4746701000006113, 4746761000006114, 4746821000006110, 6244751000006117, 6244761000006115, 6244811000006110, 6244831000006116, 6244851000006111 |
| Gastric cancer | 153111018, 153124018, 153174016, 153296016, 153367015, 288625013, 288628010, 288631011, 288632016, 288633014, 288635019, 288638017, 288639013, 288641014, 288644018, 288647013, 288649011, 288650011, 288652015, 288653013, 288654019, 288655018, 288656017, 290741017,  510074013, 1219534017, 1229372013, 721851000006117, 722341000006119,  799181000006112, 907371000006112, 3111891000006115, 4005971000006115, 4005981000006117, 4006171000006113, 4006181000006111, 4006791000006110, 4170531000006116,  4170551000006111, 4388391000006112, 4746941000006113,  4746971000006117, 4747031000006116, 4747041000006114,  4747061000006113, 4747081000006115, 4747101000006111,  4747111000006114, 5511581000006116, 5511601000006114,  5511611000006112, 6242841000006117, 6242861000006118,  6242871000006113, 6242881000006111, 11925591000006119,  11925611000006113, 11925631000006119, 11925901000006117,  12719091000006113, 12719101000006119, 12762141000006110,  13031471000006117 |
| Head and neck cancer | 153169012, 153229015, 153268010, 153340014, 153382013, 155211011, 155368011, 155542017, 155669014, 288350019, 288351015, 288354011,  288355012, 288362015, 288363013, 288364019, 288372017, 288377011,  288380012, 288382016, 288387010, 288388017, 288390016, 288391017,  288393019, 288403012, 288404018, 288406016, 288407013, 288408015,  288409011, 288410018, 288411019, 288412014, 288414010, 288417015,  288418013, 288419017, 288423013, 288429012, 288430019, 288433017,  288434011, 288435012, 288443019, 288444013, 288448011, 288449015,  288450015, 288453018, 288468017, 288469013, 288470014, 288471013,  288473011, 288474017, 288486019, 288505015, 288532013, 288546013,  288556012, 288570012. 288582015, 288803016, 289009011, 289409016, 289424013, 289431012, 290718013, 378851016, 380095017, 403771011, 406052010, 406054011, 406399011, 453301018, 510006014, 1219531013,  1219533011, 1228504019, 1228506017, 1228509012, 1228513017, 1228523014, 396301000006110, 720481000006117, 720791000006111,  720801000006112, 721041000006111, 721311000006114, 721361000006112,  721621000006110, 722911000006119, 723391000006115, 723501000006117,  723801000006115, 724401000006116, 724411000006118, 724421000006114,  724761000006110, 724781000006117, 724891000006113, 724901000006112,  725101000006111, 725611000006117, 726351000006116, 727381000006110,  727761000006116, 729361000006113, 730031000006113, 879681000006114, 879691000006112, 907401000006110, 4006741000006118, 4007001000006116, 4007621000006115, 4007641000006110, 4007691000006118, 4007811000006112, 4008551000006112,  4009001000006111, 4028311000006111, 4029361000006119,  4163211000006112, 4170281000006118, 4170401000006111,  4170421000006118, 4745221000006116, 4745231000006118,  4745241000006111, 4745251000006113, 4745311000006115,  4745321000006111, 4745331000006114, 4745341000006116,  4745351000006119, 4745381000006110, 4745391000006113,  4745441000006112, 4745451000006114, 4745461000006111,  4745471000006116, 4745481000006118, 4745491000006115,  4745501000006111, 4745511000006114, 4745551000006110, 4745571000006117, 4745621000006119, 4745641000006114,  4745681000006115, 4745691000006117, 4745711000006119,  4745721000006110, 4745741000006115, 4745761000006116,  4745781000006114, 4745931000006110, 4745941000006117,  4745951000006115, 4745961000006118, 4745981000006111,  4746011000006113, 4746021000006117, 4746041000006112,  4746301000006112, 4746311000006110, 4746321000006119,  4746331000006116, 4746341000006114, 4746361000006113,  4746461000006119, 4746471000006114, 4746491000006110,  4746501000006119, 4751071000006110, 4751081000006113, 5344701000006111, 5344731000006115, 5355361000006114, 5355381000006116, 5355391000006118, 5355601000006119, 5523391000006118, 5523431000006112, 5526171000006110, 5526181000006113, 5526191000006111, 5526201000006114, 5526221000006116, 5526231000006118, 5526241000006111, 5526251000006113, 5572871000006116, 5572881000006118, 5911401000006116, 5911411000006118, 5911421000006114, 5911431000006112, 6242811000006116, 6242821000006112, 6242831000006110, 6243291000006116, 6243301000006115, 6243491000006117, 6243501000006113, 6243511000006111, 6243541000006110, 6243551000006112, 6243561000006114, 6243591000006118, 6243601000006114, 6243641000006111, 6243651000006113, 6243661000006110, 6243671000006115, 6243691000006119, 6243701000006119, 6243721000006112, 6243741000006117, 6243821000006117, 6243831000006119, 6243841000006112, 6243851000006114, 6243861000006111, 6244071000006113, 6244081000006111, 6244091000006114, 6244101000006115, 6244111000006117, 6244121000006113, 6244241000006110, 6244251000006112, 6244261000006114, 6244271000006119, 6244281000006116, 6244291000006118, 6244311000006119, 6244321000006110, 6244331000006113, 6244351000006118, 6244361000006116, 6244561000006111, 6244701000006116, 6244711000006118, 6244761000006115, 6245721000006113, 6245781000006112, 6247731000006117, 6247741000006110, 6247761000006114, 6247771000006119, 6247781000006116, 6968521000006115, 7358381000006114, 11878501000006110, 11923431000006116, 11925531000006118, 11925691000006115, 11925701000006115, 11925731000006111, 12719081000006110, 12762221000006113, 13031541000006114 |
| Lung cancer | 153239014, 153386011, 155287019, 155361017, 288808013, 288809017, 288810010, 288811014, 288813012, 288815017, 288819011, 288820017, 288821018, 288822013, 288823015, 288824014, 288825010, 288826011,  288827019, 288828012, 288829016, 288832018, 289349013, 289432017,  289438018, 290788018, 290789014, 290791018, 290792013, 290793015,  290794014, 292105018, 403688010, 403689019, 482730011, 482731010,  482732015, 482733013, 398291000006110, 721391000006116, 723301000006110, 733371000006119, 907111000006118, 1772971000006112,  1773111000006111, 1773121000006115, 1773131000006117, 1773141000006110, 1773151000006112, 1773161000006114,  4026111000006112, 4163281000006117, 4748061000006112,  4751131000006113, 4751141000006115, 5347161000006117,  5347171000006112, 5347211000006114, 5347221000006118,  5347301000006115, 6243241000006113, 6243261000006112,  6245791000006110, 6245801000006111, 6245811000006114,  6245821000006118, 6245831000006115, 6245841000006113,  11918131000006110, 11925881000006119 |
| Melanoma | 154231019, 155060012, 173816012, 173821010, 173823013, 173825018, 173833017, 289009011, 289011019, 289012014, 289013016, 289014010, 289015011, 289017015, 289019017, 289021010, 289022015, 289023013,  289024019, 289025018, 289026017, 289027014, 289028016, 289029012,  289030019, 289031015, 289033017, 289034011, 289037016, 289039018,  289040016, 289041017, 289042012, 289043019, 289044013, 289045014,  289046010, 289047018, 289048011, 289049015, 289050015, 289051016,  289052011, 289053018, 289054012, 289055013, 289056014, 289057017,  289060012, 289063014, 290856018, 291588012, 291607010, 292116013,  292118014, 292203017, 292204011, 292213013, 335843013, 403754010, 409844012, 454085011, 457109011, 459501013, 459719019, 1221446018, 1229572014, 1230100013, 1231028010, 1234193010, 1235301017, 1235785014, 1235786010, 1235798017, 305231000006118, 305741000006115,  308181000006118, 310961000006112, 311951000006115, 311971000006113, 311981000006111, 312281000006114, 312851000006119, 314051000006119,  316791000006115, 316801000006119, 317201000006115, 396171000006118,  711081000006111, 711111000006117, 711121000006113, 711171000006114,  711181000006112, 727731000006113, 728201000006110, 880151000006112,  880161000006114, 880171000006119, 880181000006116, 880191000006118, 880201000006115, 990551000006111, 1694771000006118, 1694781000006115, 1697891000006116, 1960001000006118, 2438511000000112, 2438551000000111, 2438591000000115, 2438631000000115, 2438671000000118, 2438711000000117, 2438751000000118, 2438791000000114, 2438871000000117,  2438911000000115, 2438951000000116, 2513181000006113,  2513191000006111, 2532021000006114, 2532031000006112,  2532041000006119, 2532051000006117, 2533101000006110,  2700821000006113, 2769471000006119, 2793071000006111, 2793081000006114, 2893521000006118, 2893531000006115, 3098181000006114, 3131931000006115, 3142071000006112, 3147481000006118, 3147491000006115, 3216591000006111, 3216601000006115, 3216611000006117, 3323021000006110,  3338911000006110, 3338921000006119, 3338931000006116,  3338941000006114, 3398261000006112, 3398271000006117,  3619421000006119, 3734751000006115, 3734761000006118,  3734771000006113, 3734781000006111, 3931301000006114,  3931411000006119, 4016651000006112, 4016721000006111,  4024291000006115, 4024431000006115, 4024441000006113,  4024451000006110, 4161781000006113, 4161801000006112,  4161811000006110, 4161821000006119, 4161831000006116,  4162001000006110, 4396721000006111, 4748961000006113,  4748981000006115, 4749171000006112, 5354481000006112,  5560011000006114, 11925141000006117, 12723281000006111 |
| Multiple myeloma | 291969012, 291974016, 344819016, 344820010, 1216014013, 1231541019,  313001000006116, 313271000006116, 313381000006111, 313391000006114, 315441000006114, 315461000006113, 695561000006118, 880801000006116, 907281000006117, 2669201000006117, 3408441000006115, 3408451000006118, 3408461000006116, 3408471000006111, 3408491000006112, 3408501000006116, 6623111000006119, 11908671000006118, 11989551000006115, 12721521000006111 |
| Neuroendocrine cancer | 207611012, 215883014, 215884015, 215885019, 288727010, 291378010, 291379019, 291408013, 291411014, 291414018, 291418015, 291419011, 291425010, 291579015, 291581018, 291587019, 410798015, 1216356017, 1216670013, 1217037013, 1227435013, 1231544010, 1233536016, 306861000006116, 307191000006116, 308371000006119, 308381000006116, 308941000006114, 309401000006112, 310361000006113, 310661000006117, 310681000006110, 312881000006110, 315101000006118, 315131000006114, 317051000006113, 317261000006119, 967591000006115, 1772971000006112, 1887221000006112, 2514281000006119, 2580141000006112, 2657681000006114, 2813741000006119, 2833391000006117, 2972271000006113, 2994831000006112, 3001921000006115, 3001931000006117, 3005991000006116, 3006001000006115, 3006011000006117, 3006031000006111, 3006041000006118, 3012081000006111, 3015961000006110, 3015971000006115, 3016451000006112, 3016461000006114, 3023731000006114, 3023741000006116, 3023751000006119, 3023761000006117, 3077541000006115, 3077561000006116, 3285721000006114, 3285731000006112, 3285751000006117, 3285761000006115, 3285771000006110, 3285791000006111, 3285801000006112, 3333861000006113, 3333871000006118, 3333881000006115, 3333891000006117, 3338781000006117, 3346141000006112, 3364771000006118, 3408821000006112, 3479981000006117, 3479991000006119, 3581621000006112, 3683521000006119, 3827371000006116, 3827381000006118, 3827391000006115, 3827401000006118, 3827411000006115, 3827421000006111, 3891101000006112, 3891131000006116, 3903141000006117, 4255511000006116, 4255521000006112, 4747421000006110, 4747431000006113, 4747451000006118, 4747461000006116, 4757001000006110, 4757011000006113, 4757021000006117, 4757031000006119, 4757051000006114, 5347121000006111, 5567511000006116, 5567531000006110, 5911771000006115, 5911781000006117, 12188321000006110 |
| Ovarian cancer | 153267017, 289199018, 291524011, 376842018, 376843011, 376849010, 403753016, 1228570010, 311111000006118, 314551000006113, 314581000006117, 317051000006113, 723281000006111, 907041000006118, 3156431000006118, 3662191000006117, 6246121000006119, 6246131000006116, 6246151000006111, 12718971000006119 |
| Pancreatic cancer | 153272014, 215883014, 215884015, 288717016, 288720012, 288723014, 288727010, 288731016, 288734012, 288735013, 288736014, 291375013,  291377017, 1219538019, 1231231016, 223131000000119, 309401000006112,  310361000006113, 723401000006118, 725121000006118, 967591000006115,  2833391000006117, 3369481000006110, 3480001000006113, 3480011000006111, 3581621000006112, 4007851000006113,  4170771000006112, 4170791000006113, 4389431000006114,  4389451000006119, 4747311000006112, 4747321000006116,  4747351000006113, 4747371000006115, 4747391000006119,  4747401000006117, 4747421000006110, 4747461000006116,  5109381000006116, 6245381000006113, 6245391000006111,  6245401000006113, 6245411000006111, 6245421000006115,  12762161000006114, 13031491000006116 |
| Prostate cancer | 153295017, 722361000006115, 906971000006110, 4008071000006111, 6616721000006113, 6616751000006116, 6616761000006119 |
| Renal cancer | 289285010, 289296019, 289299014, 291445019, 291446018, 291671010, 291675018, 177051000006111, 310231000006112, 315861000006111, 722471000006119, 722481000006116, 2991911000006111, 2991931000006117, 2995091000006115, 3170631000006119, 3170641000006112, 4026331000006116, 4034431000006117, 4389821000006113, 4389831000006111, 4389841000006118,  4750361000006114, 4750381000006116, 4750401000006116,  4750411000006118, 4750421000006114, 6246501000006117,  6248191000006118, 6248201000006115, 6248211000006117,  6248221000006113, 6248231000006111, 6248241000006118, 7559601000006119, 12732731000006114 |
| Thyroid cancer | 153276012, 153380017, 288802014, 290777012, 291447010, 291448017, 291451012, 291454016, 292154013, 310161000006110, 721291000006110, 723441000006116, 907351000006119, 3435771000006116, 3953641000006118, 3953661000006119, 4008941000006119, 4008961000006115, 4419861000006112, 6246931000006118, 6246951000006113, 6246971000006115, 6246981000006117, 6246991000006119, 12762121000006115, 13031451000006110 |
| Uterine cancer | 153112013, 289166015, 289187013, 289188015, 289189011, 289190019, 289191015, 289192010, 289193017, 289194011, 289195012, 289196013, 289197016, 289198014, 403735010, 1210561014, 880381000006119, 888171000006117, 907061000006119, 4006001000006118, 6362301000006114, 6362311000006112, 6362341000006111, 6362351000006113, 6362361000006110, 6362371000006115, 6362381000006117, 12732041000006119 |

**(c)**

|  |  |
| --- | --- |
| Acute lymphoblastic leukemia | B640000 |
| Acute myeloid leukemia | B650.00, BBr6100, B650000, B650100, B65..00, B653.00, B653100, B653z00, B653000, B654.00, B65y100, B660.00, B663.00, B66..12, B670.00, B670.11, B674.00, B675.00, B675.11, B676.00, B680.00, B690.00, BBr4.00, BBr4000, BBr4011, BBr6600, BBr6700 |
| Bladder cancer | B495.00, B493.00, B49z.00, B490.00, B494.00, B491.00, B49y.00, B49y000, B49..00, B492.00, B837.00 |
| Brain cancer | B51..00, B517.00, B517z00, B51y.00, B51y200, B51yz00, B51z.00, BBb0.12, BBb1.00, BBbL.00, BBbL.11, BBbM.00, ByuA.00 |
| Breast cancer | B34..00, B34..11, B340.00, B340000, B340100, B340z00, B341.00, B342.00, B343.00, B344.00, B345.00, B346.00, B347.00, B34y.00, B34y000, B34yz00, B34z.00, BB90.00, BB91.00, BB91100, BB94.00, BB94.11, BB96.00, BB9F.00, BB9J.00, BB9J.11, BB9K.00, BB9K000, Byu6.00 |
| Colorectal cancer | BB5N100, BB5L100, BB5L300, BB52000, BB5U100, BB52.00, BB57.00, BB5y.00, BB5..00, BB5L.00, BB5N.00, BB5Lz00, BB5Nz00, BB5Uz00, BB5U.00, B1z0.11, B141.11, B13z.11, B139.00, B136.00, B134.00, B13..00, B13z.00, B132.00, B130.00, B18y200, B13y.00, B140.00, B141.00, B14..00, B133.00, B137.00, B131.00, B14z.00, B138.00, B141.12, B134.11 |
| Esophageal cancer | B10..00, B100.00, B101.00, B102.00, B103.00, B104.00, B105.00, B106.00, B10y.00, B10z.00, B10z.11, B801.00, B801000, B801100, B801200, B801z00 |
| Gastric cancer | B11..00, B11..11, B110.00, B110000, B110100, B110111, B110z00, B111.00, B111000, B111100, B111z00, B112.00, B113.00, B114.00, B115.00, B116.00, B117.00, B11y.00, B11y000, B11y100, B11yz00, B11z.00, BB55.00 |
| Head and neck cancer | B0...00, B0...11, B00..00, B00..11, B000.00, B000000, B000100, B000z00, B001.00, B001000, B001100, B001z00, B002.00, B002000, B002100, B002200, B002300, B002z00, B003.00, B003000, B003100, B003200, B003300, B003z00, B004.00, B004000, B004100, B004200, B004300, B004z00, B005.00, B006.00, B007.00, B00z000, B00z100, B00zz00, B01..00, B010.00, B010.11, B010000, B010z00, B011.00, B011000, B011100, B011z00, B012.00, B013.00, B013000, B013z00, B014.00, B015.00, B017.00, B01y.00, B01z.00, B020.00, B021.00, B04..00, B040.00, B041.00, B042.00, B04y.00, B04z.00, B05..00, B051.00, B051z00, B052.00, B053.00, B054.00, B055.00, B055000, B055100, B055z00, B05y.00, B05z.00, B061.00, B062.00, B062300, B062z00, B071100, B072000, B073100, B082.00, B08y.00, B0z2.00, B0zy.00, B0zz.00, B213.00, B213z00, B301.00, B310000, B310200, B320.00, B323300, B324.00, B324100, B324z00, B330.00, B333300, B334.00, B334100, B334z00, B524000, B542.00, B542100, B550.00, B550000, B550400, B550z00, B623100, B626100, B62y100, B800.00, B800000, B800100, B800400, B800600, B800z00, B820.00, B823000, B824.00, B824100, B824z00, B900011, Byu0.00 |
| Lung cancer | B22..00, B221100, B222.00, B222100, B222z00, B223.00, B223100, B223z00, B224.00, B224100, B224z00, B225.00, B22y.00, B22z.00, Byu2000, B313.00, B524300, B551.00, B551z00, B22z.11, B221000, B221z00, B222000, B223000, B224000, BB5S212, B222.11, BB1K.00, BBLM.00, BBTL.00, B2zy.00, BB1P.00, BB1J.00, BB1M.00, BB1L.00 |
| Melanoma | B324.00, B324100, B323300, B320.00, B324z00, B32..00, B320.00, B321.00, B322.00, B322000, B322100, B322z00, B323.00, B323000, B323100, B323200, B323300, B323400, B323500, B323z00, B324.00, B324000, B324100, B324z00, B325.00, B325000, B325100, B325200, B325300, B325400, B325500, B325600, B325700, B325800, B325z00, B326.00, B326000, B326100, B326200, B326300, B326400, B326500, B326z00, B327.00, B327000, B327100, B327200, B327300, B327400, B327500, B327600, B327700, B327800, B327900, B327z00, B328.00, B329.00, B32A.00, B32B.00, B32C.00, B32D.00, B32E.00, B32F.00, B32G.00, B32H.00, B32J.00, B32y.00, B32y000, B32z.00, B509.00, B828.00, B828000, B828100, B828200, B828300, B828400, B828500, B828600, B828700, B828800, B828900, B828W00, B828X00, BBE..00, BBE1.00, BBE1.12, BBE1000, BBE1100, BBE2.00, BBE4.00, BBEA.00, BBEC.00, BBEG.00, BBEG.11, BBEG000, BBEH.00, BBEM.00, BBEN.11, BBEP.00, BBEQ.00, BBES.00, BBET.00, BBEX.00, Byu4.00, Byu4000, Byu4100, ByuF500, ByuF600, ByuFF00 |
| Multiple myeloma | BBn0.11, B63..99, B63z.00, B63..00, BBn0.14, B630300, BBn0.00, B630.00, B630.12, BBn0.13, B630.11, BBr3z00, BBr3.00, B631.00, BBr3000, BBnz.00, BBn3.00, BBn..00 |
| Neuroendocrine cancer | B174.00, B176.00, BB5B000, BB5B100, BB5B200, BB5B300, BB5B400, BB5B500, BB5C.00, BB5C000, BB5C100, BB5Cz00, BB5R.00, BB5R000, BB5R100, BB5R111, BB5R200, BB5R300, BB5R400, BB5R500, BB5R600, BB5R800, BB5R900, BB5Rz00, BB5y100, BBD..00, BBD0.00, BBD1.00, BBD3.00, BBD4.11, BBD7.00, BBD9.11, BBDE.00, BBDz.00, BBQA200, BBz0.00 |
| Ovarian cancer | BB81.11, BB81.13, BB81.12, B833000, BB81z00, BBQA100, B440.00, BB81.00, BBC0.12, B44..00, BBCE.00, B440.11, BB81.14, BBQA200 |
| Pancreatic cancer | B17..00, B170.00, B171.00, B172.00, B173.00, B174.00, B175.00, B176.00, B17y.00, B17y000, B17yz00, B17z.00, B717011, B80z000, BB5B.00, BB5B200, BB5B300, BB5B400, BB5B500, BB5Bz00, BBLK.00 |
| Prostate cancer | B46..00 |
| Renal cancer | B4Az.00, B4A0.00, BB5a.00, B4A..11, BBL7z00, B4A1000, B4A1z00, BBL7.00, B4A1.00, BB5az00, BB5a000 |
| Thyroid cancer | BB5c.00, B8yy000, BB5cz00, BB5f.00, ByuB.00, BB5fz00, B213300, B810000, B541.00, BB5W111, B8yy200 |
| Uterine cancer | B430200, B40..00, B43..00, B43z.00, B430.00, B832.00, B430z00, B43y.00, B832.11, B432.00, B430300, B431.00, B430100, B431000, B430000, B431z00 |

**Abbreviations:** CPRD, Clinical Practice Research Datalink; ICD-10, International Classification of Diseases, 10th Revision.

**Supplementary Table 2.** Incident cancer counts by year (2011–2018) and cancer type using all linked data

| **Cancer** | **CPRD GOLD-HES-CR incident cancer counts** | | | | | | | | **CPRD Aurum-HES-CR incident cancer counts** | | | | | | | |
| --- | --- | --- | --- | --- | --- | --- | --- | --- | --- | --- | --- | --- | --- | --- | --- | --- |
| **2011** | **2012** | **2013** | **2014** | **2015** | **2016** | **2017** | **2018** | **2011** | **2012** | **2013** | **2014** | **2015** | **2016** | **2017** | **2018** |
| Acute lymphoblastic leukemia | 59 | 46 | 48 | 50 | 35 | 20 | 22 | 10 | 127 | 171 | 186 | 187 | 184 | 183 | 185 | 162 |
| Acute myeloid leukemia | 200 | 202 | 183 | 182 | 133 | 75 | 53 | 54 | 678 | 710 | 673 | 750 | 741 | 726 | 741 | 736 |
| Bladder cancer | 996 | 924 | 861 | 733 | 560 | 431 | 252 | 262 | 3075 | 3047 | 3182 | 3284 | 3253 | 3286 | 3199 | 3375 |
| Brain cancer | 241 | 226 | 252 | 190 | 134 | 106 | 76 | 74 | 899 | 889 | 919 | 889 | 934 | 960 | 961 | 995 |
| Breast cancer | 2460 | 2477 | 2378 | 2055 | 1576 | 1194 | 855 | 679 | 8172 | 8254 | 8432 | 8947 | 9070 | 8844 | 9072 | 9389 |
| Colorectal cancer | 2274 | 2196 | 2001 | 1649 | 1323 | 911 | 654 | 541 | 7487 | 7620 | 7545 | 7417 | 7647 | 7774 | 7837 | 8156 |
| Esophageal cancer | 525 | 531 | 468 | 424 | 324 | 210 | 161 | 124 | 1716 | 1739 | 1704 | 1629 | 1705 | 1691 | 1733 | 1745 |
| Gastric cancer | 446 | 419 | 351 | 317 | 246 | 146 | 118 | 86 | 1387 | 1397 | 1346 | 1349 | 1367 | 1305 | 1268 | 1255 |
| Head and neck cancer | 1213 | 1142 | 1108 | 950 | 727 | 468 | 340 | 305 | 3865 | 3762 | 4058 | 3862 | 3954 | 3973 | 3905 | 3955 |
| Lung cancer | 2115 | 1975 | 1969 | 1544 | 1316 | 928 | 651 | 541 | 7049 | 7116 | 7229 | 6965 | 7110 | 7201 | 7257 | 7392 |
| Melanoma | 1081 | 1059 | 1016 | 948 | 700 | 528 | 385 | 359 | 3335 | 3438 | 3664 | 3828 | 3858 | 4132 | 4170 | 4430 |
| Multiple myeloma | 263 | 264 | 286 | 223 | 159 | 134 | 103 | 77 | 941 | 896 | 1034 | 1016 | 1008 | 994 | 1073 | 1050 |
| Neuroendocrine carcinoma | 237 | 256 | 284 | 225 | 210 | 124 | 100 | 77 | 832 | 942 | 993 | 1054 | 1105 | 1123 | 1294 | 1218 |
| Ovarian cancer | 439 | 428 | 350 | 316 | 261 | 165 | 139 | 104 | 1369 | 1291 | 1359 | 1379 | 1286 | 1313 | 1279 | 1254 |
| Pancreatic cancer | 492 | 542 | 435 | 399 | 326 | 228 | 168 | 141 | 1662 | 1709 | 1704 | 1729 | 1780 | 1756 | 1907 | 1859 |
| Prostate cancer | 2223 | 2361 | 2316 | 1871 | 1500 | 1032 | 799 | 751 | 7037 | 7171 | 7676 | 7608 | 7941 | 8124 | 8304 | 9666 |
| Renal cancer | 473 | 480 | 507 | 433 | 364 | 240 | 165 | 151 | 1678 | 1736 | 1891 | 1928 | 2018 | 2106 | 2090 | 2107 |
| Thyroid cancer | 168 | 178 | 203 | 166 | 146 | 85 | 76 | 51 | 588 | 645 | 715 | 728 | 783 | 821 | 954 | 844 |
| Uterine cancer | 429 | 399 | 366 | 320 | 229 | 210 | 145 | 115 | 1105 | 1109 | 1067 | 1002 | 997 | 1162 | 1065 | 1008 |

**Abbreviations:** CPRD, Clinical Practice Research Datalink; CR, Cancer Registry; HES, Hospital Episode Statistics.

**Supplementary Figure 1.** Proportion (%) of incident diagnoses recorded over time in **(a)** CPRD Aurum, HES, and CR compared with the fully linked CPRD Aurum-HES-CR dataset, and **(b)** CPRD GOLD, HES, and CR compared with the fully linked CPRD GOLD-HES-CR dataset

**(a)**


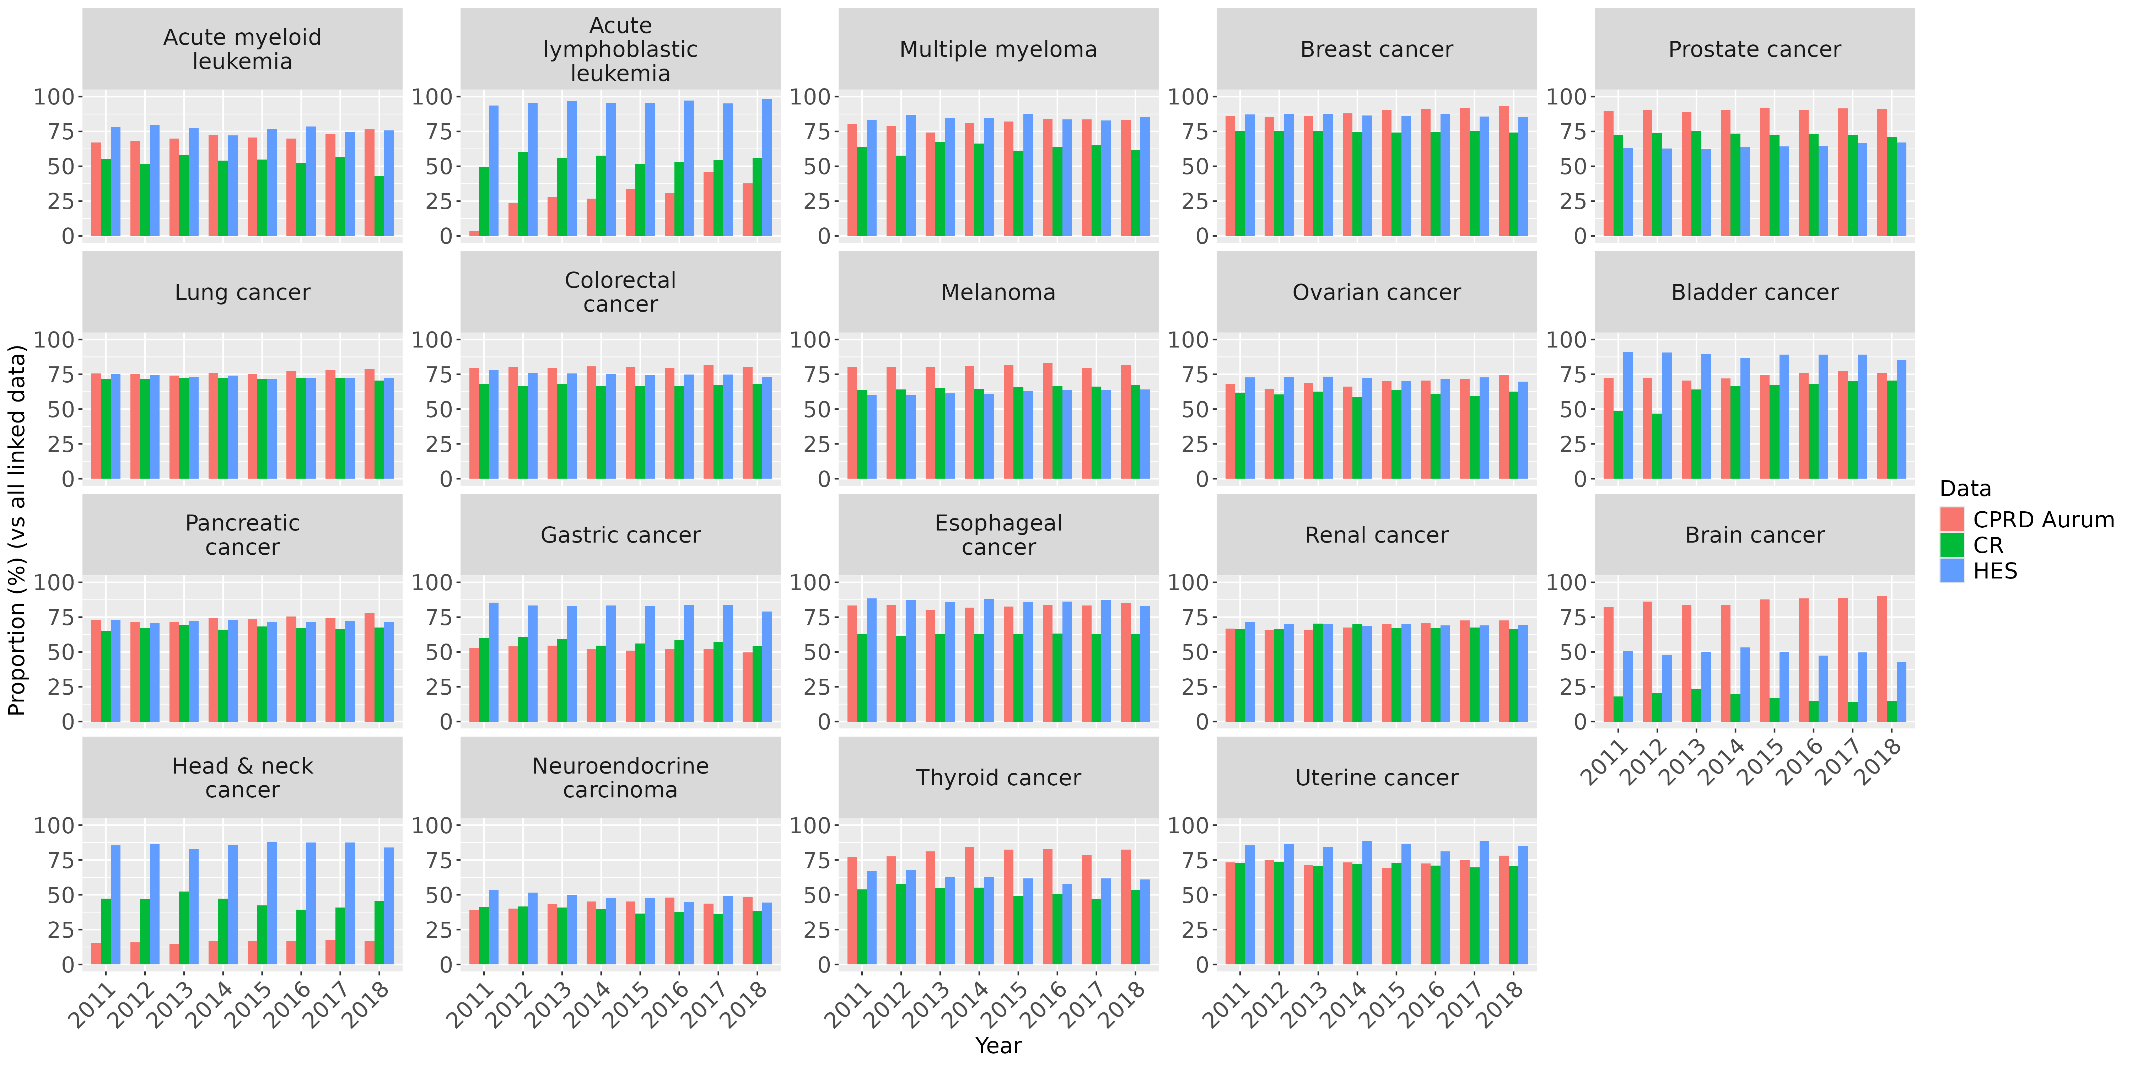


**(b)**

***
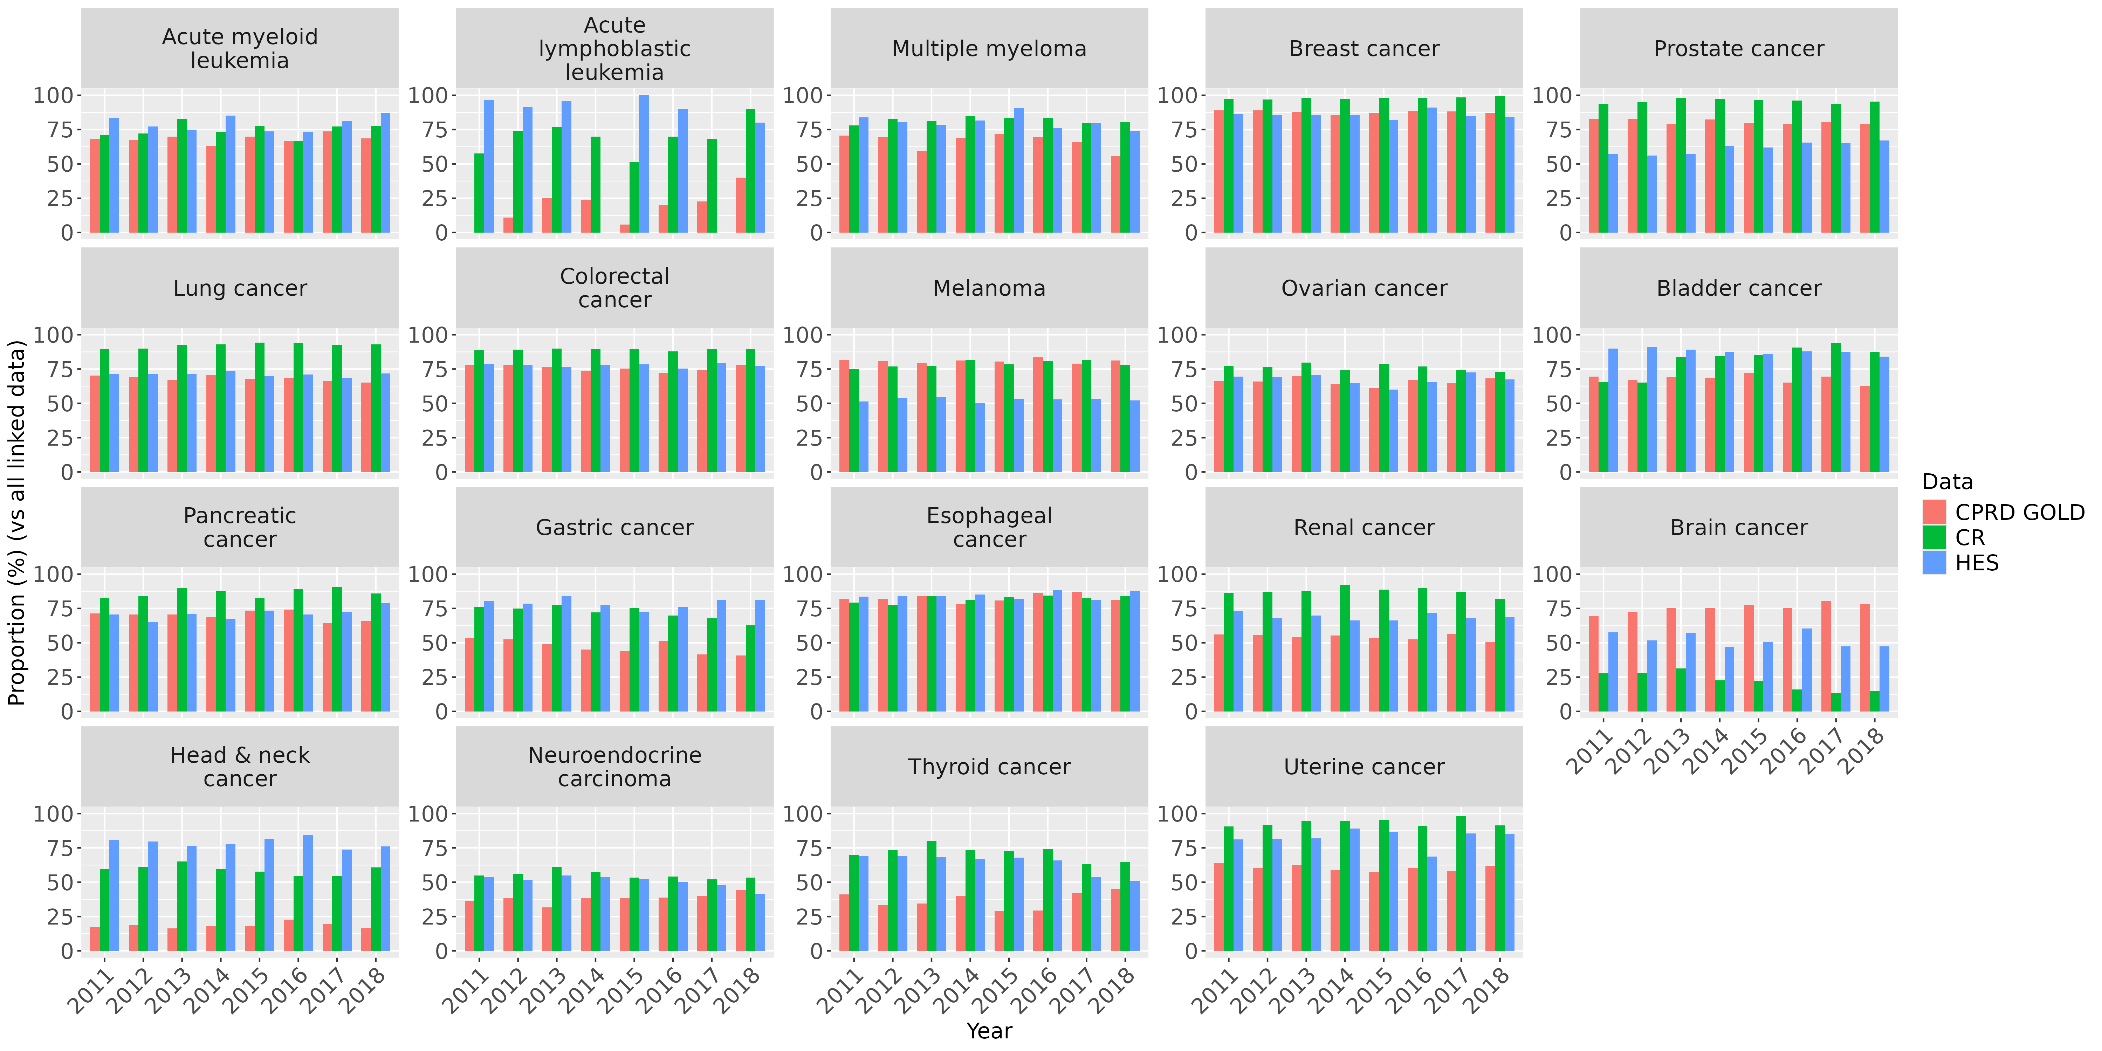
***

**Abbreviations:** CPRD, Clinical Practice Research Datalink; CR, Cancer Registry; HES, Hospital Episode Statistics.
